# Supplementary material for: Coculture of primary human colon monolayer with human gut bacteria
Source: Springer Nature journal article supplement (doi:10.1038/s41596-021-00562-w), 2021-06-28
Supplement: MOESM1 [file 41596_2021_562_MOESM1_ESM18.pdf]

---

## Supplementary information

---

# Coculture of primary human colon monolayer with human gut bacteria

---

In the format provided by the  
authors and unedited

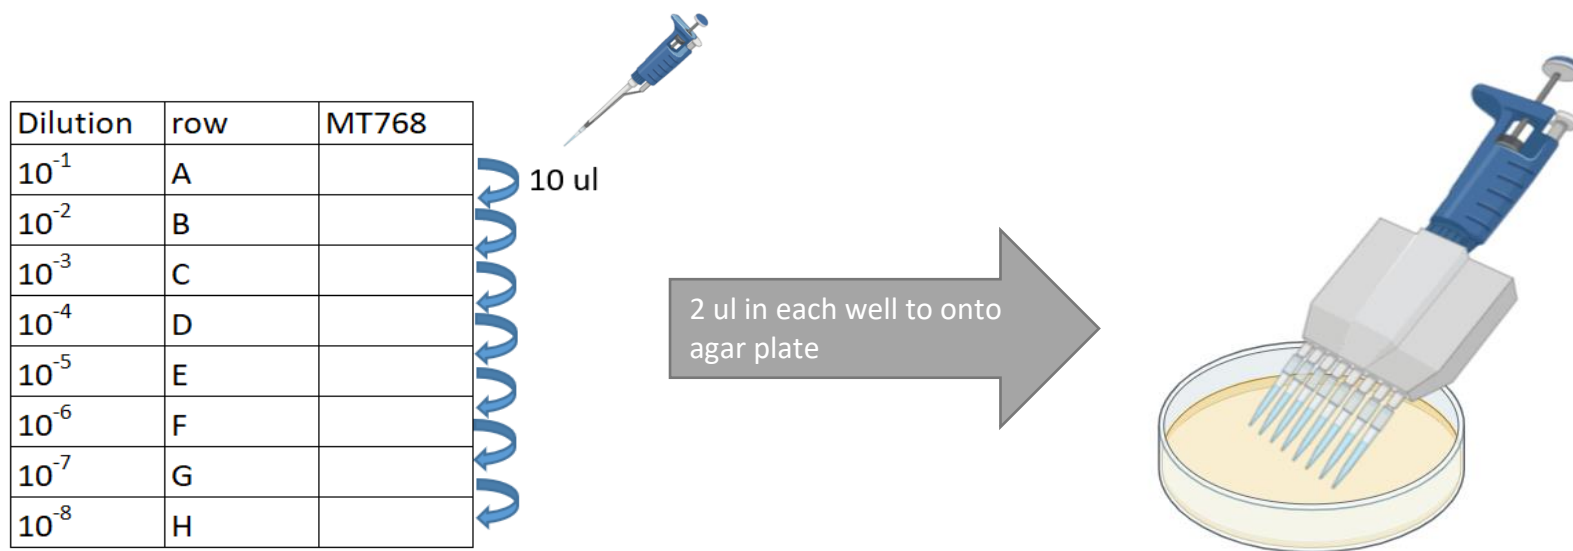

**Figure S1. Serial dilution and plating of bacterial culture. All steps are carried out in anaerobic workstation.**
