# Supplementary material for: Coculture of primary human colon monolayer with human gut bacteria
Source: Springer Nature journal article supplement (doi:10.1038/s41596-021-00562-w), 2021-06-28
Supplement: MOESM2 [file 41596_2021_562_MOESM2_ESM19.xlsx]

## Sheet: Table S1
Table S1. Growth curve of B. thetaiotaomicron MT768
		CFU/mL
Time (h)	OD600	Replicate 1	Replicate 2
0	0.1276	85000000	95000000
4.5	0.2436	950000000	900000000
6	0.2736	2000000000	3500000000
9	0.462	15000000000	30000000000
10.5	0.7701	120000000000	70000000000
Doubling time:	1.12 h	Y=Y0*exp(k*X)	X is time, Y is CFU/ml
