# Supplementary material for: Coculture of primary human colon monolayer with human gut bacteria
Source: Springer Nature journal article supplement (doi:10.1038/s41596-021-00562-w), 2021-06-28
Supplement: MOESM3 [file 41596_2021_562_MOESM3_ESM20.xlsx]

## Sheet: Table S2
Table S2. Calculation of RPUL from OD600 and luminescence data. Related to Figure 7e
		OD				OD-blank														luminescence reading					RLU/CFU					RPUL
1st experiment	MT768	MT798	MT799	MT800	blank	MT768	MT798	MT799	MT800		CFU	Y=Y0*e(k*OD)	CFU in 15 ul	MT768	MT798	MT799	MT800			MT768	MT798	MT799	MT800		MT768	MT798	MT799	MT800		MT768	MT798	MT799	MT800
NO	0.1452	0.1511	0.3147	0.2743	0.0304	0.1148	0.1207	0.2843	0.2439		Y0	1462919997	t=6h	4.16212e+07	4.30132e+07	1.07098e+08	8.54961e+07		NO	45905	2341	97429	1518		0.00110292	5.44251e-05	0.000909721	1.77552e-05		1	0.0493462	0.824827	0.0160983
aTC	0.1492	0.1464	0.2412	0.2709		0.1188	0.116	0.2108	0.2405		k	5.576		4.25599e+07	4.19006e+07	7.10871e+07	8.38905e+07		aTC	43691	724	7904	11210		0.00102658	1.7279e-05	0.000111188	0.000133627		1	0.0168317	0.108309	0.130167
DCA	0.132	0.2478	0.2393	0.2397		0.1016	0.2174	0.2089	0.2093					3.86678e+07	7.37519e+07	7.03379e+07	7.0495e+07		DCA	39207	18986	17567	1518		0.00101395	0.000257431	0.000249751	2.15334e-05		1	0.25389	0.246317	0.0212373
DCA+ATC	0.1367	0.2161	0.2281	0.2488		0.1063	0.1857	0.1977	0.2184			2.98003e+09		3.96945e+07	6.18027e+07	6.60796e+07	7.41643e+07		DCA+ATC	36710	1462	9110	1575		0.000924813	2.36559e-05	0.000137864	2.12366e-05		1	0.0255791	0.149072	0.0229632
		OD				OD minus blank																			RLU/CFU					RPUL
2nd experiment	MT768	MT798	MT799	MT800		MT768	MT798	MT799	MT800		CFU	Y=Y0*e(k*OD)	CFU in 15 ul	MT768	MT798	MT799	MT800			MT768	MT788	MT789	MT800		MT768	MT798	MT799	MT800		MT768	MT798	MT799	MT800
NO	0.2118	0.2084	0.2208	0.2926		0.1814	0.178	0.1904	0.2622		Y0	1462919997	t=6h	6.03385e+07	5.92054e+07	6.34438e+07	9.46809e+07		NO	61031	2682	22392	596		0.00101148	4.52999e-05	0.000352942	6.29483e-06		1	0.044786	0.348938	0.00622341
aTCAtc	0.1847	0.1976	0.2244	0.2113		0.1543	0.1672	0.194	0.1809		k	5.576		5.18763e+07	5.57452e+07	6.47303e+07	6.01706e+07		aTC	29870	724	2001	1958		0.000575793	1.29877e-05	3.09129e-05	3.25408e-05		1	0.0225561	0.0536875	0.0565148
DCA	0.2205	0.1912	0.2407	0.216		0.1901	0.1608	0.2103	0.1856					6.33378e+07	5.3791e+07	7.08892e+07	6.17683e+07		DCA	57881	5094	3349	426		0.000913846	9.46999e-05	4.72428e-05	6.89674e-06		1	0.103628	0.0516966	0.00754694
DCA+ATC	0.1835	0.1856	0.1911	0.1932		0.1531	0.1552	0.1607	0.1628					5.15303e+07	5.21373e+07	5.3761e+07	5.43942e+07		DCA+ATC	43663	710	667	412		0.000847327	1.36179e-05	1.24068e-05	7.57434e-06		1	0.0160716	0.0146423	0.0089391
																														RPUL
																												Average of 8/20/19 and 8/28/19 Expt RPULs		MT768	MT798	MT799	MT800
																												NO		1	0.0470661	0.586882	0.0111609
																												aTC		1	0.0196939	0.0809984	0.093341
																												DCA		1	0.178759	0.149007	0.0143921
																												DCA+ATC		1	0.0208254	0.0818573	0.0159511
