# Supplementary material for: Coculture of primary human colon monolayer with human gut bacteria
Source: Springer Nature journal article supplement (doi:10.1038/s41596-021-00562-w), 2021-06-28
Supplement: MOESM4 [file 41596_2021_562_MOESM4_ESM21.xlsx]

## Sheet: Table S3
Table S3. The OD600 and luminescence signal for bacterial cells collected from top and bottom of the apical compartment in the transwell inserts
		OD600						luminescence reading
		MT768	MT798	MT799	MT800			MT768	MT798	MT799	MT800
Top media	NO	0.0842	0.0779	0.0769	0.1147		NO	17198	695	4612	241
	aTC	0.0569	0.0556	0.0655	0.1275		aTC	7081	383	1717	142
	DCA	0.0532	0.0618	0.0434	0.0583		DCA	7265	596	2852	114
	DCA+ATC	0.0535	0.062	0.0612	0.0605		DCA+ATC	6428	241	2512	71
Bottom media	NO	0.1148	0.1207	0.2843	0.2439		NO	45905	2341	97429	1518
	aTC	0.1188	0.116	0.2108	0.2405		aTC	43691	724	7904	11210
	DCA	0.1016	0.2174	0.2089	0.2093		DCA	39207	18986	17567	1518
	DCA+ATC	0.1063	0.1857	0.1977	0.2184		DCA+ATC	36710	1462	9110	1575
